# Supplementary material
Source: PubMed Central journal article supplement (PMC6869166)
Supplement: HBM-35-2073-s001.pdf [file HBM-35-2073-s001.pdf]

---

CONCORDANCE OF WHITE MATTER  
AND GRAY MATTER ABNORMALITIES  
IN AUTISM SPECTRUM DISORDERS

---

SUPPORTING ONLINE MATERIALS

---

## SUPPLEMENTARY FIGURES AND TABLES

**FIG S1** FLOWCHART OF INCLUDED STUDIES

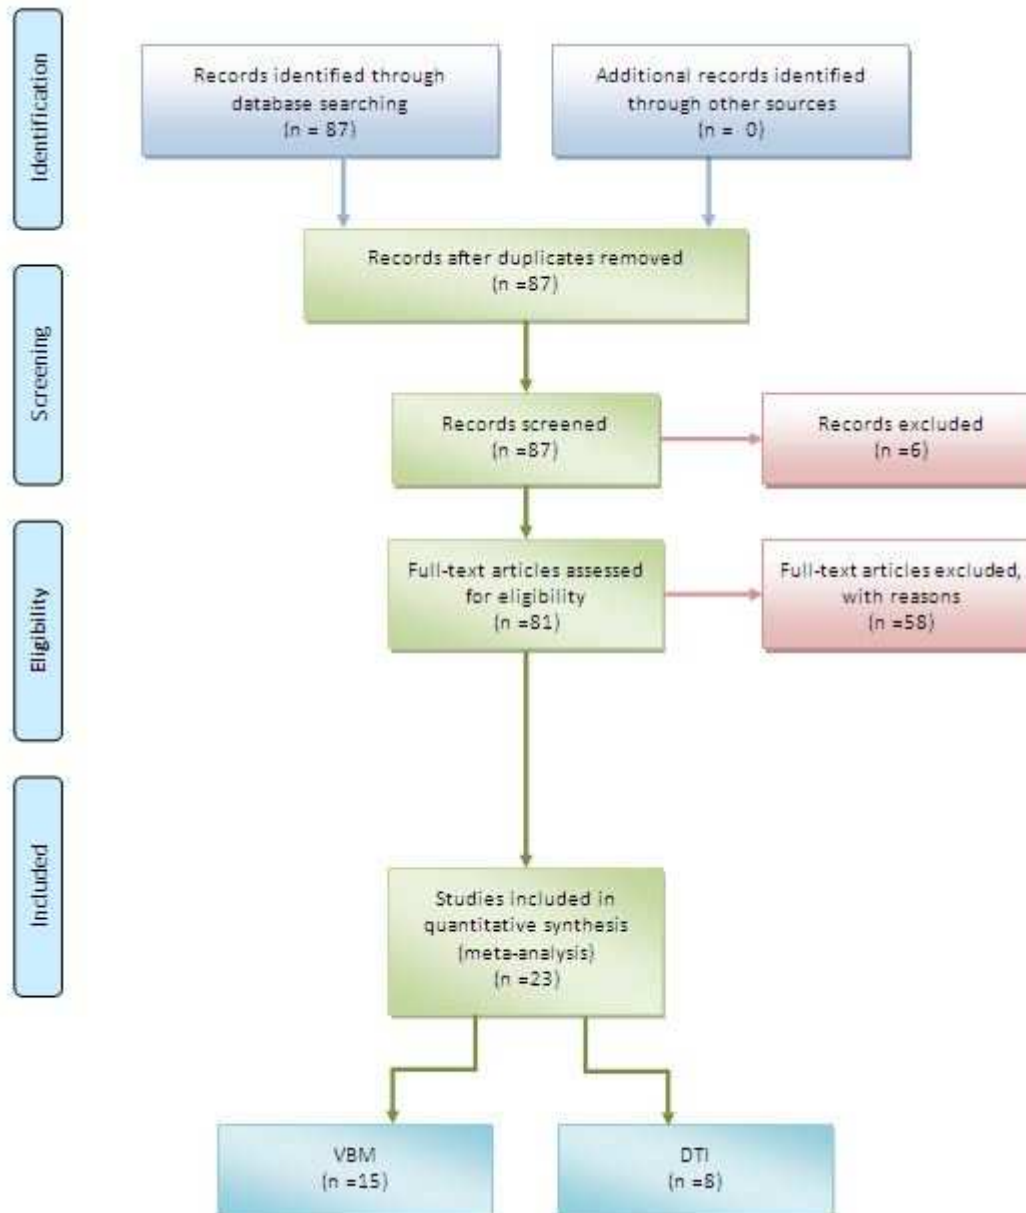

FIG S2: JACKKNIFE ANALYSIS RESULTS

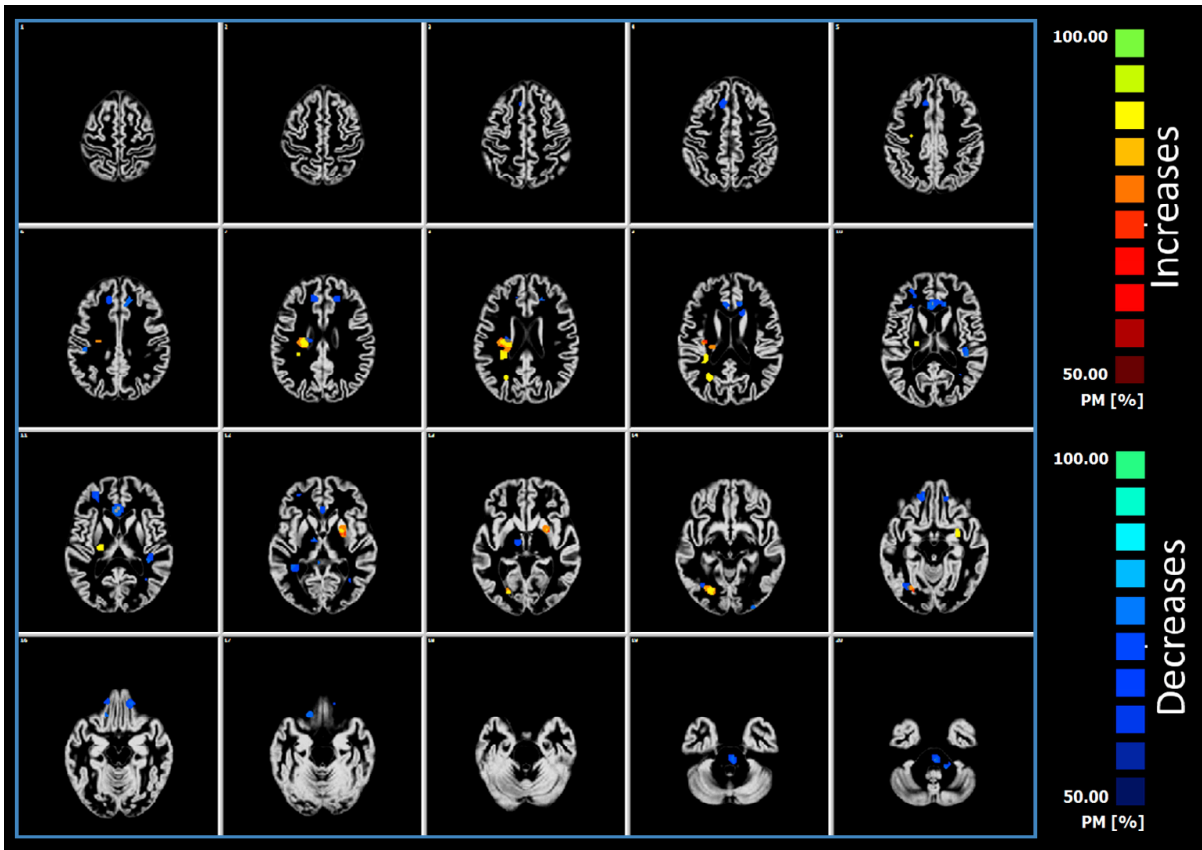

THE FIGURE SHOW A PROBABILITY MAPS WERE A HIGH PROBABILITY MEANS THAT A CERTAIN AREA IS LEAD BY THE MAJORITY OF THE EXPERIMENTS INCLUDED. BY CONTRARY A LOW PROBABILITY MEANS THAT A CERTAIN AREA IS LEAD BY FEW EXPERIMENTS, THUS INDICATING THAT THE INTERPRETATION OF THIS POINT HAVE TO BE CAUTIOUS. BLUE COLORS INDICATE WM DECREASES RESULTS; RED COLORS INDICATES WM INCREASES RESULTS.

**TAB. S1** ALE WHITE MATTER RESULTS

**WHITE MATTER INCREASE**

| Cluster | Area                                                  | Voxel | x   | y   | z   | ALE P value |
|---------|-------------------------------------------------------|-------|-----|-----|-----|-------------|
| 1       | Right Superior Corona Radiata                         | 3649  | 24  | -18 | 30  | 20.00       |
| 2       | Right MIDDLE FRONTAL WM                               | 16    | 32  | 21  | 30  | 2.57        |
| 3       | Right Posterior Thalamic Radiation                    | 995   | 27  | -72 | -3  | 16.07       |
| 4       | Right Posterior Corona Radiata                        | 455   | 27  | -60 | 21  | 15.05       |
| 5       | Right Posterior Limb of Internal Capsule <sup>1</sup> | 603   | 24  | -18 | 12  | 17.61       |
| 6       | Right Cingulum                                        | 16    | 14  | -3  | 36  | 2.70        |
| 7       | Right Genu of Corpus Callosum                         | 22    | 14  | 27  | 0   | 5.08        |
| 8       | Left Middle Cerebellar Peduncle                       | 16    | -16 | -39 | -36 | 2.70        |
| 9       | Left External Capsule                                 | 963   | -24 | 6   | 3   | 17.87       |
| 10      | Left Sagittal Stratum <sup>2</sup>                    | 278   | -31 | 0   | -9  | 12.44       |
| 11      | Left Retrolenticular part of Internal Capsule         | 16    | -30 | -27 | -2  | 2.57        |
| 12      | Left MIDDLE FRONTAL WM                                | 22    | -31 | 45  | 0   | 10.16       |
| 13      | Left INFERIOR FRONTAL WM                              | 59    | -44 | 12  | 18  | 5.08        |

**WHITE MATTER DECREASE**

| Cluster | Area                                    | Voxel | x   | y   | z   | Ale P value |
|---------|-----------------------------------------|-------|-----|-----|-----|-------------|
| 1       | Right SLF                               | 147   | 42  | -24 | 36  | 9.82        |
| 2       | Right Posterior Thalamic Radiation      | 575   | 36  | -42 | 6   | 14.89       |
| 3       | Right Sagittal Striatum                 | 523   | 36  | -66 | -9  | 14.06       |
| 4       | Right MIDDLE FRONTAL GYRUS WM           | 864   | 30  | 48  | 12  | 16.66       |
| 5       | Right INFERIOR FRONTAL WM               | 123   | 30  | 27  | 15  | 10.23       |
| 6       | Right Superior Corona Radiata           | 482   | 27  | -12 | 27  | 10.22       |
| 7       | Right Middle Cerebella Peduncle         | 91    | 24  | -42 | -33 | 10.55       |
| 8       | Right Anterior Corona Radiata           | 456   | 18  | 45  | -12 | 12.74       |
| 9       | Right MIDDLE FRONTO-ORBITAL WM          | 492   | 18  | 30  | -18 | 12.67       |
| 10      | Right SUPERIOR FRONTAL WM               | 685   | 12  | 24  | 45  | 12.02       |
| 11      | Right SUPERIOR FRONTAL WM               | 602   | 12  | 36  | 33  | 11.88       |
| 12      | Right POSTERIOR THALAMIC RADIATION      | 497   | 12  | -9  | 3   | 12.62       |
| 13      | Bilateral Cingulum                      | 2666  | 3   | 30  | 12  | 20.00       |
| 14      | Right Splenium of Corpus Callosum       | 110   | 6   | -36 | 9   | 10.77       |
| 15      | Left PONS                               | 897   | -3  | -27 | -30 | 18.26       |
| 16      | Left SUPERIOR FRONTAL WM                | 675   | -18 | 36  | 30  | 10.78       |
| 17      | Left Anterior Corona Radiata            | 741   | -12 | 45  | -15 | 17.77       |
| 18      | Left Genu of Corpus Callosum            | 183   | -15 | 21  | 21  | 10.59       |
| 19      | Left Middle Cerebellar Peduncle         | 224   | -15 | -33 | -33 | 10.54       |
| 20      | Left SUPERIOR PARIETAL WM               | 51    | -16 | -72 | 42  | 4.59        |
| 21      | Left Posterior Limb of Internal Capsule | 64    | -18 | -15 | 0   | 9.13        |

*Follow on next page*

<sup>1</sup> include Right External Capsule

<sup>2</sup> include Inferior longitudinal fasciculum and Inferior Fronto-Occipital Fasciculus

|    |                                   |     |     |     |    |       |
|----|-----------------------------------|-----|-----|-----|----|-------|
| 22 | Left MIDDLE OCCIPITAL GYRUS WM    | 169 | -24 | -93 | -4 | 9.83  |
| 23 | Left Posterior Thalamic Radiation | 143 | -29 | -57 | 15 | 7.07  |
| 24 | Left SLF                          | 849 | -39 | -27 | 15 | 12.50 |
